# Supplementary material for: The signature of liver cancer in immune cells DNA methylation
Source: Clin Epigenetics. 2018 Jan 18;10:8. doi: 10.1186/s13148-017-0436-1 (PMC5774119; doi:10.1186/s13148-017-0436-1)
Supplement: Supplementary file 13 — Differentially methylated that correlate with HCC progression in PBMC. (CSV 57 kb) [file 13148_2017_436_MOESM13_ESM.csv]

CHR.x	MAPINFO.x	gene.x	feature.x	cgi.x	lasso.radius	dmr.no	dmr.start	dmr.end	dmr.size	dmr.core.start	dmr.core.end	dmr.core.size	dmr.p	r	P.Val_r	adj.P.Val-r
20	60528758	MIR1257	TSS200	open sea	26	9901	60525320	60528802	3483	60525775	60528758	2984	2.07E-14	-0.930330276	0	0
14	105521842	GPR132	5'UTR	open sea	260	7817	105521582	105522221	640	105521842	105521961	120	8.32E-14	-0.927983105	0	0
3	48697504	CELSR3	1stExon	shore	66	1810	48697434	48697627	194	48697456	48697594	139	3.07E-11	-0.9186427	0	0
6	31730910	C6orf26	1stExon	open sea	82	3507	31730515	31735051	4537	31730576	31734580	4005	0.002393965	-0.917258322	0	0
20	50385760	ATP9A	TSS1500	shore	64	9884	50385473	50388955	3483	50385486	50387214	1729	6.73E-07	-0.911041975	0	0
19	46522135	MIR769	TSS200	shelf	26	9661	46521303	46523461	2159	46521386	46522575	1190	9.54E-16	-0.90977788	0	0
8	145729196	GPT	TSS1500	shore	64	5274	145729071	145729260	190	145729106	145729196	91	1.63E-09	-0.903780282	0	0
2	106468318	NCK2	5'UTR	open sea	260	1276	106467863	106468383	521	106467866	106468318	453	2.86E-06	-0.898433089	0	0
8	145641996	SLC39A4	1stExon	island	43	5271	145641735	145642029	295	145641882	145642024	143	0.000384469	-0.898211837	0	0
6	31108108	PSORS1C2	TSS1500	open sea	113	3458	31104909	31113497	8589	31105337	31113026	7690	6.96E-36	-0.893863142	0	0
19	50413083	NUP62	5'UTR	open sea	260	9686	50412381	50413485	1105	50412816	50413083	268	2.70E-10	-0.886735559	0	0
17	44928967	WNT9B	5'UTR	island	50	8991	44928917	44929045	129	44928967	44928995	29	2.08E-05	-0.884093225	0	0
3	12597236	MKRN2	TSS1500	shore	64	1720	12593732	12597593	3862	12595473	12597236	1764	5.51E-07	-0.88200748	0	0
17	55162322	AKAP1	TSS1500	island	28	9042	55162270	55162326	57	55162284	55162322	39	3.54E-06	-0.877427936	0	0
1	225965676	SRP9	1stExon	island	43	858	225965630	225965924	295	225965676	225965777	102	3.11E-12	-0.876852691	0	0
3	52828794	ITIH3	5'UTR	open sea	260	1840	52828534	52829054	521	52828583	52828818	236	1.87E-06	-0.875097871	0	0
16	2261107	C16orf79	TSS200	shelf	26	8207	2261056	2261108	53	2261069	2261107	39	7.54E-11	-0.872862339	0	0
12	6741882	LPAR5	5'UTR	open sea	260	6704	6741389	6742142	754	6741649	6741882	234	2.56E-11	-0.872304738	0	0
21	46845110	NCRNA00175	TSS200	shelf	26	9974	46843997	46845769	1773	46844883	46845160	278	6.92E-08	-0.871855557	0	0
11	2722076	KCNQ1OT1	TSS1500	island	28	6081	2721128	2722465	1338	2721207	2722440	1234	1.06E-19	-0.871182919	0	0
17	39157349	KRTAP3-2	TSS1500	open sea	113	8931	39153776	39157778	4003	39155777	39157349	1573	2.03E-14	-0.867381036	0	0
20	30433512	FOXS1	TSS200	shore	18	9815	30433288	30433526	239	30433405	30433512	108	4.05E-07	-0.867186487	0	0
14	73395839	DCAF4	5'UTR	shelf	1625	7646	73394153	73397464	3312	73395778	73396628	851	8.87E-08	-0.867030382	0	0
7	866102	UNC84A	5'UTR	shelf	1625	4076	864477	868031	3555	866102	866406	305	5.46E-10	-0.866705477	0	0
16	89390968	ANKRD11	5'UTR	open sea	260	8619	89390349	89391049	701	89390609	89390968	360	1.99E-27	-0.865498543	0	0
1	154531432	UBE2Q1	TSS1500	island	28	651	154531390	154531446	57	154531393	154531432	40	4.11E-07	-0.862817585	0	0
6	29408229	OR10C1	1stExon	open sea	82	3348	29408098	29408262	165	29408113	29408232	120	2.71E-08	-0.862588942	0	0
10	43867041	FXYD4	TSS200	open sea	26	5526	43866844	43867415	572	43866966	43867155	190	8.26E-10	-0.862556994	0	0
19	17982708	SLC5A5	TSS200	island	9	9542	17982699	17982717	19	17982700	17982716	17	1.66E-08	-0.861143172	0	0
5	180286037	ZFP62	5'UTR	shore	117	3115	180285920	180286235	316	180286037	180286118	82	4.03E-15	-0.86042273	0	0
1	179262956	SOAT1	TSS200	island	9	758	179262939	179262965	27	179262948	179262956	9	5.48E-07	-0.860167682	0	0
16	31147044	PRSS8	1stExon	open sea	82	8340	31146935	31147136	202	31146999	31147054	56	1.55E-09	-0.858962893	0	0
19	54200652	MIR525	TSS200	open sea	26	9716	54200392	54201334	943	54200652	54201247	596	4.96E-09	-0.857665837	0	0
22	20236758	MIR1286	TSS200	open sea	26	9988	20236726	20237693	968	20236751	20237341	591	7.03E-05	-0.856993914	0	0
4	37962012	PTTG2	TSS200	open sea	26	2326	37961984	37962926	943	37962012	37962455	444	5.59E-05	-0.856928766	0	0
4	720809	PCGF3	5'UTR	shelf	1625	2133	717412	723907	6496	719011	722282	3272	3.18E-15	-0.85654521	0	0
1	228337311	GJC2	TSS1500	open sea	113	873	228337198	228337886	689	228337311	228337626	316	6.20E-08	-0.856046438	0	0
6	159466542	TAGAP	TSS1500	open sea	113	3918	159466345	159466571	227	159466427	159466542	116	2.15E-10	-0.854097962	0	0
21	45233585	LOC284837	TSS1500	open sea	113	9961	45233472	45233698	227	45233508	45233662	155	2.08E-08	-0.853813052	0	0
7	1573451	MAFK	5'UTR	shelf	1625	4119	1571826	1575076	3251	1572252	1574413	2162	0.000256091	-0.851339459	0	0
3	49058272	DALRD3	5'UTR	shore	117	1812	49058134	49058614	481	49058251	49058586	336	2.54E-14	-0.85030359	0	0
1	150692971	HORMAD1	5'UTR	open sea	260	619	150692840	150693360	521	150692971	150693299	329	1.80E-11	-0.848972321	0	0
14	101291933	MEG3	TSS1500	shore	64	7753	101291765	101291955	191	101291829	101291933	105	1.16E-11	-0.848558128	0	0
8	102804702	NCALD	5'UTR	open sea	260	5118	102804418	102805176	759	102804678	102804916	239	6.71E-08	-0.847994566	0	0
19	56740672	ZSCAN5A	TSS1500	shore	64	9735	56740614	56744096	3483	56740672	56742355	1684	8.32E-11	-0.847199261	0	0
6	83775765	UBE2CBP	TSS1500	island	28	3736	83775725	83775793	69	83775730	83775765	36	1.87E-08	-0.847038925	0	0
4	3443694	HGFAC	TSS200	open sea	26	2205	3443653	3443817	165	3443656	3443735	80	6.94E-10	-0.846937478	0	0
3	183353451	KLHL24	5'UTR	island	50	2065	183353372	183353472	101	183353372	183353451	80	3.72E-08	-0.846327722	0	0
2	121554817	GLI2	TSS200	open sea	26	1315	121554622	121555142	521	121554696	121554926	231	1.19E-12	-0.846232414	0	0
6	39895417	MOCS1	5'UTR	open sea	260	3648	39895246	39896188	943	39895360	39895717	358	0.000970497	-0.845377922	0	0
17	7758171	TMEM88	TSS1500	shore	64	8757	7757753	7758174	422	7757933	7758171	239	0.00067692	-0.845093191	0	0
2	9697298	ADAM17	TSS1500	shore	64	1044	9697239	9700721	3483	9697298	9698980	1683	4.86E-07	-0.844408691	0	0
6	34723499	SNRPC	TSS1500	shore	64	3626	34720291	34723773	3483	34722032	34723499	1468	6.88E-08	-0.843140304	0	0
16	88923519	TRAPPC2L	1stExon	island	43	8590	88923464	88923562	99	88923481	88923519	39	1.76E-06	-0.842551231	0	0
17	79304420	TMEM105	5'UTR	open sea	260	9243	79304160	79304796	637	79304188	79304683	496	1.31E-19	-0.842512608	0	0
17	73720591	ITGB4	5'UTR	shelf	1625	9114	73718966	73722278	3313	73719693	73720840	1148	6.45E-06	-0.84150809	0	0
3	29322474	RBMS3	TSS1500	open sea	113	1751	29322229	29322481	253	29322342	29322474	133	6.45E-06	-0.84150809	0	0
6	26108434	HIST1H1T	TSS200	shelf	26	3249	26106710	26109960	3251	26107687	26109295	1609	1.41E-21	-0.840980828	0	0
3	172858969	SPATA16	1stExon	open sea	82	2044	172858887	172859104	218	172858917	172859049	133	3.49E-16	-0.839952171	0	0
19	33622866	WDR88	TSS200	shore	18	9577	33622838	33622890	53	33622856	33622872	17	1.34E-10	-0.838929534	0	0
6	117996486	NUS1	TSS200	island	9	3825	117996371	117996488	118	117996399	117996486	88	1.07E-22	-0.838257909	0	0
3	169782135	GPR160	5'UTR	open sea	260	2039	169780055	169782395	2341	169780131	169782135	2005	1.07E-22	-0.838257909	0	0
11	8954598	C11orf16	TSS200	open sea	26	6123	8954459	8954623	165	8954541	8954606	66	9.96E-10	-0.838231623	0	0
16	23652796	PALB2	TSS200	island	9	8300	23652787	23652887	101	23652796	23652875	80	0.000101532	-0.836683095	0	0
1	10490063	APITD1	TSS200	shore	18	197	10490025	10490076	52	10490025	10490063	39	1.18E-09	-0.836366653	0	0
3	126237373	UROC1	TSS1500	open sea	113	1942	126237260	126237486	227	126237289	126237462	174	2.84E-10	-0.835827053	0	0
1	78353349	NEXN	TSS1500	shore	64	487	78353303	78353431	129	78353349	78353422	74	5.44E-07	-0.835141659	0	0
1	151345248	SELENBP1	TSS200	open sea	26	627	151344863	151345383	521	151345123	151345248	126	1.96E-08	-0.835099399	0	0
9	140125696	SLC34A3	5'UTR	shelf	1625	5319	140124071	140127321	3251	140125311	140127246	1936	2.51E-11	-0.834862828	0	0
1	145507653	RBM8A	1stExon	island	43	589	145507610	145507696	87	145507616	145507663	48	6.92E-10	-0.83261776	0	0
4	185377277	IRF2	5'UTR	shore	117	2542	185377057	185377394	338	185377174	185377277	104	1.57E-07	-0.832267046	0	0
5	38257555	EGFLAM	TSS1500	shore	64	2732	38257452	38257619	168	38257516	38257555	40	1.07E-06	-0.832123637	0	0
16	4901809	UBN1	5'UTR	shelf	1625	8250	4899878	4903434	3557	4901503	4903054	1552	5.92E-07	-0.831262052	0	0
2	27498173	DNAJC5G	TSS200	open sea	26	1100	27498035	27498594	560	27498173	27498334	162	5.48E-09	-0.829952836	0	0
10	11866910	C10orf47	5'UTR	shore	117	5455	11866521	11869808	3288	11866910	11868183	1274	1.22E-05	-0.829529166	0	0
6	31689459	LY6G6C	5'UTR	shore	117	3503	31684783	31689588	4806	31685430	31689459	4030	7.15E-25	-0.829044819	0	0
5	31797570	PDZD2	TSS1500	open sea	113	2717	31795785	31797589	1805	31796646	31797570	925	1.50E-12	-0.828813374	0	0
10	50507003	C10orf71	TSS200	open sea	26	5551	50506954	50507474	521	50507003	50507214	212	1.76E-12	-0.828446627	0	0
12	49180849	ADCY6	5'UTR	shore	117	6790	49178298	49181548	3251	49178406	49181056	2651	3.64E-06	-0.827539921	0	0
12	56623244	SLC39A5	TSS1500	open sea	113	6869	56622137	56623404	1268	56622608	56623244	637	7.83E-14	-0.827495933	0	0
5	1201713	SLC6A19	5'UTR	island	50	2609	1201663	1201763	101	1201691	1201713	23	7.15E-09	-0.826624334	0	0
2	111435583	BUB1	1stExon	island	43	1287	111435540	111435668	129	111435583	111435625	43	5.52E-09	-0.826058924	0	0
10	88428117	LDB3	TSS1500	open sea	113	5652	88423626	88428689	5064	88425627	88428429	2803	1.30E-24	-0.82598716	0	0
11	118550443	TREH	TSS200	open sea	26	6554	118550435	118550487	53	118550443	118550485	43	2.87E-07	-0.8259269	0	0
4	3315925	RGS12	5'UTR	shelf	1625	2198	3314300	3317550	3251	3315040	3316915	1876	1.19E-09	-0.824656427	0	0
5	140098398	VTRNA1-2	TSS200	open sea	26	2923	140098105	140099047	943	140098230	140098576	347	7.05E-08	-0.823873103	0	0
19	11093828	SMARCA4	5'UTR	open sea	260	9488	11093362	11093882	521	11093459	11093828	370	2.84E-07	-0.822482407	0	0
5	42469007	GHR	5'UTR	open sea	260	2740	42468519	42469267	749	42468779	42469007	229	1.86E-08	-0.822326362	0	0
16	3493428	ZNF597	1stExon	island	43	8226	3493380	3493483	104	3493423	3493440	18	5.35E-11	-0.820841372	0	0
1	2345368	PEX10	TSS1500	shore	64	61	2345269	2345474	206	2345333	2345410	78	1.18E-22	-0.820644498	0	0
16	31449483	ZNF843	5'UTR	shelf	1625	8344	31449472	31452722	3251	31449483	31452152	2670	2.27E-06	-0.820543945	0	0
22	44708761	KIAA1644	TSS200	open sea	26	10079	44708409	44708929	521	44708669	44708908	240	3.95E-19	-0.819821	0	0
7	115862660	TES	TSS1500	open sea	113	4584	115862420	115863497	1078	115862648	115863026	379	0.00026882	-0.817681015	0	0
17	33914403	AP2B1	1stExon	open sea	82	8874	33914242	33914762	521	33914243	33914502	260	3.32E-11	-0.817247868	0	0
8	143868110	LY6D	TSS200	open sea	26	5229	143867860	143868162	303	143867942	143868158	217	1.41E-16	-0.816385269	0	0
12	68647498	IL22	TSS1500	open sea	113	6904	68647385	68647611	227	68647387	68647590	204	3.38E-08	-0.815442681	0	0
11	796607	SLC25A22	TSS1500	shore	64	5997	793547	797207	3661	794433	796607	2175	5.43E-14	-0.813142359	0	0
1	153600762	S100A13	TSS1500	open sea	113	644	153600649	153600978	330	153600762	153600972	211	9.25E-11	-0.812101185	0	0
2	9144618	MBOAT2	TSS1500	island	28	1038	9144577	9144657	81	9144605	9144629	25	1.10E-12	-0.811668813	0	0
1	22979495	C1QB	TSS200	open sea	26	273	22979479	22979999	521	22979495	22979739	245	5.38E-09	-0.810385227	0	0
10	26931926	LOC731789	TSS200	open sea	26	5501	26931565	26932528	964	26931731	26932057	327	3.49E-09	-0.809247792	0	0
11	47607809	FAM180B	TSS1500	shelf	97	6241	47604063	47609608	5546	47606064	47609357	3294	1.32E-14	-0.808336318	0	0
2	128403286	GPR17	TSS200	open sea	26	1329	128402613	128403604	992	128403084	128403286	203	2.34E-06	-0.808078468	0	0
8	82192788	FABP5	1stExon	island	43	5076	82192745	82192834	90	82192777	82192791	15	4.21E-09	-0.807056487	0	0
1	214776477	CENPF	TSS200	island	9	831	214776460	214776486	27	214776469	214776477	9	2.63E-05	-0.806557536	0	0
7	99517192	TRIM4	TSS200	island	9	4523	99517108	99517194	87	99517136	99517192	57	2.63E-05	-0.806557536	0	0
11	100862189	TMEM133	TSS1500	open sea	113	6497	100859374	100863376	4003	100861375	100863057	1683	4.78E-09	-0.806286395	0	0
6	31438939	HCG26	TSS200	open sea	26	3474	31438566	31439586	1021	31438939	31439412	474	4.78E-09	-0.806286395	0	0
10	94833520	CYP26A1	1stExon	island	43	5667	94833038	94833701	664	94833042	94833658	617	1.75E-10	-0.806012988	0	0
20	45314291	SLC13A3	TSS1500	shelf	97	9869	45311166	45315267	4102	45313167	45314291	1125	1.57E-10	-0.805515051	0	0
2	231090376	SP140	TSS200	open sea	26	1541	231090271	231091216	946	231090329	231090745	417	9.64E-13	-0.804949224	0	0
10	95721819	PIPSL	TSS200	open sea	26	5671	95720971	95721913	943	95721181	95721819	639	3.19E-07	-0.803200483	0	0
19	46999444	PNMAL2	TSS1500	shore	64	9665	46999339	46999467	129	46999366	46999444	79	2.37E-05	-0.802843511	0	0
17	59668589	NACA2	TSS200	open sea	26	9067	59668475	59668639	165	59668557	59668616	60	2.36E-08	-0.802509487	0	0
2	237489107	CXCR7	5'UTR	open sea	260	1581	237488802	237490003	1202	237489107	237489920	814	7.70E-07	-0.802148998	0	0
17	17480905	PEMT	5'UTR	open sea	260	8805	17480645	17481319	675	17480905	17481059	155	2.55E-09	-0.800362408	0	0
13	60970987	TDRD3	5'UTR	island	50	7317	60970937	60971058	122	60970987	60971008	22	2.55E-09	-0.800362408	0	0
7	21582749	DNAH11	TSS200	island	9	4275	21582740	21582758	19	21582745	21582758	14	2.55E-09	-0.800362408	0	0
17	26684865	TMEM199	1stExon	island	43	8838	26684846	26685140	295	26684865	26685074	210	0.000135199	0.80098033	0	0
16	81040594	CENPN	5'UTR	island	50	8468	81040544	81040689	146	81040594	81040639	46	3.58E-19	0.801260531	0	0
11	43333495	API5	TSS200	island	9	6205	43333469	43333555	87	43333495	43333512	18	9.39E-09	0.801313877	0	0
17	31254875	TMEM98	TSS200	island	9	8865	31254841	31254877	37	31254854	31254875	22	5.71E-16	0.801811039	0	0
1	26186113	C1orf135	TSS1500	island	28	294	26186059	26186115	57	26186070	26186113	44	1.51E-06	0.801909983	0	0
16	15737279	NDE1	1stExon	open sea	82	8283	15736757	15737699	943	15736852	15737573	722	4.92E-14	0.802562475	0	0
3	10028395	TMEM111	1stExon	open sea	82	1701	10028392	10028556	165	10028395	10028530	136	5.94E-13	0.802840769	0	0
3	44379878	C3orf23	5'UTR	island	50	1788	44379849	44379980	132	44379878	44379930	53	2.71E-10	0.802924633	0	0
19	52489831	ZNF350	5'UTR	open sea	260	9706	52489523	52490423	901	52489783	52490310	528	3.24E-29	0.80298692	0	0
17	72889714	FADS6	TSS200	island	9	9104	72889699	72889726	28	72889708	72889717	10	3.95E-10	0.803064287	0	0
10	73479514	C10orf105	1stExon	open sea	82	5604	73479436	73480108	673	73479514	73479848	335	2.68E-10	0.803332925	0	0
4	107238002	TBCK	TSS200	open sea	26	2428	107237467	107238385	919	107237473	107238125	653	1.46E-12	0.803621888	0	0
19	58144466	ZNF211	TSS200	island	9	9751	58144450	58144475	26	58144459	58144466	8	3.65E-16	0.803784132	0	0
1	38156369	C1orf109	TSS200	shore	18	352	38156330	38156458	129	38156359	38156394	36	7.08E-20	0.803955436	0	0
5	34008444	AMACR	TSS1500	shore	64	2722	34008367	34008527	161	34008431	34008463	33	4.58E-13	0.805227816	0	0
1	52456381	RAB3B	TSS200	island	9	423	52456298	52456384	87	52456341	52456381	41	3.68E-17	0.805277705	0	0
6	28249142	PGBD1	TSS1500	shore	64	3305	28249078	28249206	129	28249142	28249205	64	2.97E-11	0.805460632	0	0
6	158589302	SERAC1	1stExon	island	43	3911	158589251	158589350	100	158589294	158589318	25	9.34E-16	0.805530906	0	0
20	5730942	C20orf196	TSS200	open sea	26	9784	5730813	5731333	521	5730859	5731259	401	1.34E-06	0.805634201	0	0
6	31795195	HSPA1B	TSS1500	shore	64	3517	31795001	31795721	721	31795008	31795678	671	2.36E-14	0.805766284	0	0
21	36421857	RUNX1	TSS1500	open sea	113	9935	36421744	36422068	325	36421857	36421955	99	4.67E-13	0.805862844	0	0
12	42719598	PPHLN1	TSS1500	shore	64	6775	42719480	42719662	183	42719544	42719598	55	3.17E-16	0.806079924	0	0
12	54366875	HOXC11	TSS200	island	9	6838	54366859	54366959	101	54366859	54366909	51	3.31E-10	0.806175649	0	0
20	60795465	HRH3	TSS200	island	9	9903	60795448	60795474	27	60795457	60795465	9	5.57E-14	0.806414366	0	0
7	44084071	DBNL	TSS200	shore	18	4359	44083966	44084094	129	44084030	44084071	42	7.42E-11	0.806494653	0	0
16	56228505	DKFZP434H168	TSS200	shelf	26	8376	56228469	56228537	69	56228495	56228511	17	1.99E-19	0.806675851	0	0
6	88117504	C6orf165	TSS1500	shore	64	3751	88117440	88117568	129	88117504	88117559	56	1.98E-10	0.807195842	0	0
6	33239977	VPS52	TSS1500	island	28	3600	33238980	33240212	1233	33239127	33240148	1022	4.29E-17	0.807367325	0	0
17	77813223	CBX4	TSS200	island	9	9186	77813212	77813236	25	77813221	77813227	7	1.26E-10	0.807439387	0	0
16	89384602	ANKRD11	5'UTR	open sea	260	8617	89384461	89384981	521	89384602	89384937	336	1.69E-31	0.807445168	0	0
12	9102068	M6PR	5'UTR	shore	83	317	29101946	29102316	371	29101952	29102153	202	3.71E-13	0.807477236	0	0
1	46769114	LRRC41	TSS200	shore	18	403	46768992	46769412	421	46769030	46769348	319	1.49E-23	0.807940423	0	0
20	44509743	ZSWIM1	TSS200	open sea	26	9861	44509507	44510113	607	44509606	44510001	396	4.56E-06	0.80827719	0	0
8	145754561	MGC70857	TSS200	island	9	5276	145754516	145754662	147	145754538	145754589	52	9.82E-11	0.808423877	0	0
1	247268441	ZNF669	TSS1500	shore	64	936	247268402	247271884	3483	247268441	247270143	1703	4.94E-10	0.808654845	0	0
2	74682176	INO80B	TSS200	island	9	1214	74682150	74682250	101	74682176	74682200	25	8.47E-09	0.808664799	0	0
11	62623438	SNORD27	TSS1500	island	28	6289	62622819	62623458	640	62622834	62623438	605	1.69E-19	0.808895946	0	0
4	174291991	SAP30	TSS200	island	9	2517	174291982	174292161	180	174291991	174292144	154	4.06E-19	0.808952987	0	0
2	17935212	SMC6	TSS200	island	9	1072	17935212	17935230	19	17935212	17935227	16	1.51E-07	0.809150755	0	0
19	16178091	TPM4	TSS1500	shore	64	9532	16178027	16178163	137	16178091	16178099	9	1.08E-29	0.809155762	0	0
1	179198400	ABL2	1stExon	island	43	757	179198277	179198435	159	179198356	179198414	59	4.90E-12	0.809300542	0	0
4	56685845	LOC644145	TSS1500	open sea	113	2370	56685774	56686716	943	56685845	56686245	401	1.03E-11	0.809325457	0	0
6	122792965	PKIB	TSS200	island	9	3830	122792748	122792989	242	122792759	122792987	229	2.09E-19	0.809677839	0	0
7	99102447	ZKSCAN5	5'UTR	island	50	4522	99102388	99102488	101	99102391	99102481	91	2.37E-10	0.809730053	0	0
2	190648631	ORMDL1	5'UTR	island	50	1453	190648581	190648684	104	190648605	190648634	30	3.85E-13	0.810199142	0	0
13	95248457	TGDS	1stExon	island	43	7346	95248396	95248500	105	95248439	95248457	19	3.20E-07	0.810488164	0	0
1	114414312	PTPN22	5'UTR	open sea	260	560	114413571	114414513	943	114414042	114414408	367	9.29E-11	0.810567677	0	0
2	180871787	CWC22	TSS200	island	9	1437	180871714	180871800	87	180871757	180871787	31	2.96E-09	0.810607791	0	0
13	33860056	STARD13	TSS200	open sea	26	7262	33859990	33860100	111	33859993	33860083	91	2.39E-52	0.810741961	0	0
15	91260537	BLM	TSS200	island	9	8086	91260528	91260653	126	91260537	91260647	111	7.45E-08	0.810744941	0	0
12	121019242	POP5	TSS200	island	9	7048	121019142	121019242	101	121019192	121019242	51	2.30E-13	0.811382294	0	0
1	28559476	DNAJC8	1stExon	island	43	311	28559418	28559579	162	28559461	28559575	115	2.14E-13	0.811535478	0	0
16	4588809	C16orf5	1stExon	island	43	8244	4588766	4588852	87	4588809	4588844	36	5.50E-14	0.811598301	0	0
14	75988820	BATF	5'UTR	open sea	260	7663	75988540	75989060	521	75988735	75988820	86	7.22E-08	0.811633825	0	0
5	111093286	C5orf13	5'UTR	shore	117	2863	111093080	111093387	308	111093197	111093286	90	6.74E-09	0.811864078	0	0
2	233415416	EIF4E2	1stExon	island	43	1551	233415373	233415465	93	233415416	233415465	50	1.45E-11	0.812293887	0	0
17	3500374	TRPV1	TSS1500	open sea	113	8701	3500261	3500530	270	3500274	3500417	144	1.40E-08	0.812340796	0	0
4	41750466	PHOX2B	1stExon	shore	66	2340	41750215	41750509	295	41750362	41750466	105	1.59E-09	0.812900245	0	0
4	83932170	LIN54	5'UTR	island	50	2399	83932118	83932291	174	83932168	83932227	60	5.47E-12	0.812924147	0	0
5	137514295	BRD8	1stExon	shore	66	2909	137514114	137514408	295	137514240	137514385	146	4.10E-08	0.813165784	0	0
3	48481703	CCDC51	TSS200	island	9	1807	48481619	48481850	232	48481622	48481793	172	1.11E-09	0.813251019	0	0
5	180581315	OR2V2	TSS1500	open sea	113	3117	180581188	180581428	241	180581301	180581315	15	9.19E-18	0.813474834	0	0
18	11148783	FAM38B	TSS200	island	9	9323	11148767	11148785	19	11148769	11148783	15	5.17E-12	0.813715696	0	0
6	52929657	FBXO9	TSS1500	shore	64	3699	52929587	52929732	146	52929651	52929709	59	1.46E-06	0.814111471	0	0
2	71222292	TEX261	TSS1500	island	28	1199	71222275	71222403	129	71222292	71222339	48	1.21E-09	0.814278185	0	0
11	35684217	TRIM44	TSS200	shore	18	6196	35684183	35684237	55	35684201	35684219	19	9.42E-20	0.814289033	0	0
3	118753610	IGSF11	5'UTR	island	50	1922	118753610	118753723	114	118753610	118753714	105	1.43E-10	0.814311981	0	0
6	33256912	WDR46	1stExon	island	43	3605	33256727	33265677	8951	33256755	33265605	8851	4.57E-59	0.814814448	0	0
2	239112248	ILKAP	5'UTR	island	50	1593	239112164	239112298	135	239112214	239112248	35	3.55E-07	0.814904034	0	0
6	99963462	USP45	TSS1500	island	28	3775	99963448	99963576	129	99963449	99963512	64	3.48E-06	0.815013885	0	0
1	209825747	LAMB3	1stExon	open sea	82	813	209825559	209825829	271	209825672	209825747	76	1.48E-12	0.815068126	0	0
12	56618115	OBFC2B	TSS200	island	9	6868	56618111	56618239	129	56618115	56618214	100	4.73E-08	0.815188885	0	0
8	27950282	ELP3	TSS1500	shore	64	4956	27950218	27950364	147	27950282	27950300	19	1.66E-13	0.815354109	0	0
12	50561318	LASS5	TSS1500	island	28	6804	50561280	50561346	67	50561295	50561318	24	4.28E-09	0.816056967	0	0
5	176074466	TSPAN17	5'UTR	island	50	3068	176074416	176074534	119	176074466	176074484	19	3.54E-09	0.816255033	0	0
16	19729769	C16orf88	TSS1500	island	28	8289	19729728	19729802	75	19729756	19729774	19	2.69E-14	0.81628561	0	0
12	77459885	E2F7	TSS1500	island	28	6919	77459837	77459893	57	77459840	77459885	46	2.24E-07	0.817643046	0	0
10	74927836	FAM149B1	TSS200	island	9	5611	74927736	74928248	513	74927742	74928184	443	4.02E-12	0.817725778	0	0
1	22109593	USP48	5'UTR	island	50	267	22109507	22109645	139	22109557	22109595	39	1.66E-12	0.817933023	0	0
4	36245632	ARAP2	5'UTR	island	50	2324	36245454	36245727	274	36245571	36245632	62	4.49E-11	0.818373263	0	0
4	54965829	GSX2	TSS1500	shore	64	2364	54959231	54965927	6697	54959419	54965904	6486	3.32E-50	0.818378329	0	0
11	5706362	TRIM5	TSS200	open sea	26	6105	5706355	5706407	53	5706362	5706406	45	1.43E-11	0.818486333	0	0
6	86352639	SYNCRIP	1stExon	island	43	3747	86352580	86352682	103	86352623	86352639	17	1.36E-13	0.818726301	0	0
2	172750996	SLC25A12	TSS200	island	9	1395	172750988	172751044	57	172750994	172751016	23	7.22E-08	0.818785191	0	0
1	110162465	AMPD2	1stExon	island	43	542	110162422	110162531	110	110162465	110162488	24	7.26E-08	0.819175661	0	0
4	55095261	PDGFRA	TSS200	shore	18	2368	55095216	55095348	133	55095226	55095282	57	1.18E-08	0.819469273	0	0
1	150208726	ANP32E	TSS1500	shore	64	611	150208662	150208790	129	150208665	150208726	62	2.01E-06	0.820343435	0	0
2	233897149	NEU2	TSS1500	open sea	113	1554	233897036	233897262	227	233897149	233897259	111	2.77E-07	0.821286976	0	0
1	38466544	FHL3	5'UTR	open sea	260	356	38465052	38469329	4278	38466544	38467704	1161	9.54E-15	0.8218382	0	0
17	10600923	C17orf48	TSS200	island	9	8781	10600905	10601094	190	10600905	10601044	140	3.92E-17	0.821843863	0	0
20	271425	C20orf96	TSS200	island	9	9761	271408	271434	27	271417	271432	16	9.52E-16	0.821887612	0	0
4	24982060	CCDC149	TSS1500	open sea	113	2316	24981947	24982173	227	24981949	24982173	225	4.25E-15	0.822028756	0	0
8	70983567	PRDM14	TSS200	island	9	5051	70983487	70983575	89	70983530	70983567	38	1.78E-16	0.822046876	0	0
13	45694585	GTF2F2	TSS200	island	9	7289	45694571	45694594	24	45694580	45694593	14	9.35E-11	0.822162688	0	0
15	80445147	FAH	TSS200	open sea	26	8042	80445014	80445240	227	80445127	80445229	103	3.65E-08	0.822211921	0	0
11	77899778	KCTD21	TSS200	island	9	6466	77899767	77899790	24	77899776	77899781	6	6.96E-11	0.822232485	0	0
11	86013179	C11orf73	TSS1500	open sea	113	6479	86013066	86013345	280	86013123	86013232	110	4.75E-09	0.822545469	0	0
8	123793836	ZHX2	TSS200	island	9	5142	123793821	123793839	19	123793823	123793836	14	9.27E-11	0.822960615	0	0
12	21810762	LDHB	1stExon	island	43	6744	21810333	21811098	766	21810450	21811034	585	2.10E-17	0.823091626	0	0
19	633735	POLRMT	TSS200	shore	18	9405	633706	633849	144	633735	633785	51	6.40E-14	0.823233187	0	0
11	108092785	ATM	TSS1500	shore	64	6512	108092333	108093388	1056	108092397	108093386	990	3.56E-20	0.823343217	0	0
1	154127537	NUP210L	1stExon	open sea	82	649	154125951	154130042	4092	154127138	154128041	904	3.56E-20	0.823343217	0	0
2	70476188	TIA1	TSS1500	shore	64	1191	70476124	70476252	129	70476139	70476188	50	8.58E-15	0.823609412	0	0
8	66546615	ARMC1	TSS200	shore	18	5039	66546572	66546716	145	66546615	66546652	38	6.14E-07	0.823611379	0	0
11	8703888	RPL27A	TSS200	island	9	6121	8703868	8703893	26	8703871	8703888	18	2.92E-15	0.823657095	0	0
1	149981687	OTUD7B	5'UTR	shore	117	609	149981537	149981851	315	149981654	149981734	81	6.15E-16	0.824268043	0	0
12	82752718	CCDC59	TSS1500	island	28	6927	82752168	82752746	579	82752172	82752718	547	1.76E-20	0.824581146	0	0
6	30710952	FLOT1	TSS1500	island	28	3437	30710727	30712101	1375	30710755	30712060	1306	1.76E-20	0.824581146	0	0
16	10837683	NUBP1	TSS200	island	9	8267	10837662	10837748	87	10837667	10837705	39	6.40E-08	0.824775398	0	0
17	7589344	TP53	5'UTR	island	50	8755	7589294	7589430	137	7589344	7589380	37	7.66E-13	0.824986935	0	0
6	116989975	ZUFSP	TSS200	open sea	26	3823	116989869	116990033	165	116989951	116989978	28	7.24E-15	0.825947821	0	0
6	30028768	ZNRD1	TSS1500	shore	64	3382	30028186	30030216	2031	30028250	30030069	1820	5.29E-27	0.826477408	0	0
18	42260134	SETBP1	TSS200	island	9	9356	42260121	42260139	19	42260121	42260134	14	3.03E-09	0.827285826	0	0
12	56211718	ORMDL2	TSS200	shore	18	6861	56211512	56211732	221	56211520	56211718	199	2.20E-20	0.827523291	0	0
7	112758954	LOC401397	TSS1500	open sea	113	4580	112758031	112758973	943	112758502	112758954	453	1.61E-14	0.82769829	0	0
20	43538745	PABPC1L	5'UTR	island	50	9853	43538695	43538819	125	43538745	43538769	25	2.48E-18	0.82811749	0	0
10	95462349	C10orf4	TSS200	island	9	5670	95462275	95462375	101	95462325	95462365	41	4.70E-11	0.828917801	0	0
10	104503666	C10orf26	TSS200	open sea	26	5729	104503638	104503713	76	104503664	104503687	24	4.61E-11	0.8294245	0	0
19	15236813	ILVBL	TSS1500	shore	64	9526	15236728	15236877	150	15236755	15236813	59	1.11E-08	0.829643309	0	0
17	61699501	MAP3K3	TSS1500	island	28	9070	61699473	61699529	57	61699475	61699522	48	6.65E-10	0.829663694	0	0
22	51021438	CHKB-CPT1B	TSS200	island	9	10108	51021427	51021585	159	51021438	51021532	95	9.95E-06	0.829984188	0	0
17	78010277	CCDC40	TSS200	island	9	9192	78010259	78010277	19	78010264	78010277	14	3.42E-17	0.830038369	0	0
1	220263237	BPNT1	TSS200	open sea	26	841	220262757	220263277	521	220263017	220263239	223	3.80E-10	0.83029902	0	0
1	93646470	TMED5	TSS1500	island	28	515	93646441	93646626	186	93646459	93646562	104	1.49E-09	0.830329359	0	0
1	184724736	EDEM3	TSS1500	shore	64	767	184724672	184724864	193	184724736	184724800	65	3.73E-13	0.830590546	0	0
12	109536079	UNG	1stExon	island	43	6981	109536063	109536149	87	109536079	109536137	59	1.48E-10	0.830745816	0	0
14	59103353	DACT1	TSS1500	shore	64	7607	59100532	59104014	3483	59101719	59103353	1635	1.00E-07	0.831074297	0	0
2	96931861	TMEM127	TSS200	island	9	1247	96931847	96931933	87	96931853	96931890	38	2.92E-10	0.83142823	0	0
8	124408918	ATAD2	TSS1500	island	28	5149	124408885	124408941	57	124408885	124408918	34	0.000537814	0.831493497	0	0
12	123319894	HIP1R	TSS200	island	9	7067	123319891	123319909	19	123319894	123319906	13	8.52E-07	0.832895339	0	0
3	119813301	GSK3B	TSS200	island	9	1926	119813301	119813319	19	119813301	119813316	16	1.57E-16	0.833518207	0	0
18	56296544	ALPK2	TSS1500	open sea	113	9376	56296336	56296720	385	56296354	56296607	254	1.51E-14	0.833579838	0	0
6	80816147	BCKDHB	TSS200	island	9	3734	80816013	80816151	139	80816077	80816147	71	1.16E-12	0.833976984	0	0
20	24929716	CST7	TSS200	open sea	26	9808	24929494	24929720	227	24929607	24929716	110	1.25E-17	0.834121704	0	0
17	8023687	ALOXE3	TSS1500	shore	64	8762	8023623	8023751	129	8023638	8023707	70	9.10E-20	0.834926367	0	0
11	118123053	MPZL3	TSS200	open sea	26	6550	118122244	118123186	943	118122715	118123099	385	0.004439478	0.834965706	0	0
17	43237975	HEXIM2	TSS1500	shore	64	8985	43237911	43238100	190	43237975	43238036	62	9.27E-15	0.835484743	0	0
6	36410508	PXT1	5'UTR	island	50	3640	36410435	36410603	169	36410485	36410553	69	1.98E-14	0.835499942	0	0
8	120651236	ENPP2	TSS200	open sea	26	5138	120651204	120651430	227	120651236	120651398	163	2.27E-16	0.835648537	0	0
1	63988814	ITGB3BP	5'UTR	open sea	260	455	63987948	63989091	1144	63988419	63989080	662	1.62E-19	0.835659266	0	0
5	96144134	ERAP1	TSS1500	shore	64	2851	96144037	96144198	162	96144043	96144134	92	6.07E-16	0.835671723	0	0
10	75936245	ADK	TSS200	island	9	5617	75936139	75936297	159	75936218	75936278	61	1.12E-16	0.835751474	0	0
2	97001281	NCAPH	TSS1500	shore	64	1249	97001210	97001345	136	97001274	97001304	31	3.31E-06	0.835820735	0	0
8	101965385	YWHAZ	5'UTR	island	50	5114	101965335	101965463	129	101965385	101965413	29	1.02E-10	0.835876882	0	0
13	24463526	MIPEP	1stExon	island	43	7227	24463483	24463860	378	24463526	24463743	218	1.79E-18	0.835912168	0	0
8	11561361	GATA4	TSS1500	island	28	4906	11560735	11561536	802	11560763	11561531	769	4.30E-12	0.83591944	0	0
8	6264171	MCPH1	5'UTR	island	50	4880	6264121	6264236	116	6264171	6264193	23	8.29E-10	0.836062789	0	0
7	136553595	CHRM2	1stExon	shore	66	4635	136553225	136553939	715	136553243	136553884	642	1.14E-17	0.836294234	0	0
11	22359326	SLC17A6	TSS1500	shelf	97	6160	22359229	22359442	214	22359326	22359345	20	1.82E-10	0.836528301	0	0
20	45318455	TP53RK	TSS200	island	9	9870	45318439	45318466	28	45318448	45318457	10	1.89E-13	0.837369204	0	0
11	107328586	CWF19L2	TSS200	island	9	6509	107328509	107328609	101	107328525	107328605	81	1.40E-11	0.837576449	0	0
1	235492074	GGPS1	5'UTR	island	50	903	235492024	235492124	101	235492059	235492111	53	6.53E-16	0.837584794	0	0
11	62573193	NXF1	TSS1500	shore	64	6287	62573129	62573257	129	62573142	62573255	114	1.19E-15	0.838913441	0	0
2	98612552	TMEM131	TSS200	island	9	1259	98612532	98612588	57	98612542	98612560	19	4.25E-12	0.839320838	0	0
19	17377977	C19orf62	TSS1500	open sea	113	9536	17377977	17378556	580	17377977	17378296	320	5.66E-21	0.839616179	0	0
6	31866072	EHMT2	TSS1500	shore	64	3524	31865973	31866136	164	31866020	31866117	98	5.94E-08	0.840106964	0	0
3	129830324	LOC729375	TSS200	island	9	1969	129830309	129830327	19	129830310	129830324	15	2.06E-17	0.840166688	0	0
20	61568896	DIDO1	5'UTR	island	50	9912	61568806	61568956	151	61568856	61568906	51	7.72E-11	0.840865672	0	0
2	102314477	MAP4K4	TSS200	island	9	1270	102314464	102314758	295	102314465	102314757	293	1.26E-05	0.840947688	0	0
5	162888000	NUDCD2	TSS1500	shore	64	3021	162887936	162888064	129	162887936	162888040	105	2.17E-05	0.840961099	0	0
22	38082335	NOL12	TSS200	island	9	10044	38082306	38082392	87	38082319	38082349	31	5.50E-09	0.841021717	0	0
13	41837767	MTRF1	TSS200	open sea	26	7280	41837265	41837923	659	41837525	41837891	367	4.18E-13	0.841023088	0	0
1	67390768	MIER1	5'UTR	island	50	466	67390682	67390818	137	67390732	67390768	37	7.92E-13	0.841522396	0	0
7	38948777	VPS41	1stExon	open sea	82	4345	38947989	38949004	1016	38948460	38948895	436	9.25E-12	0.841683269	0	0
19	6772811	VAV1	5'UTR	open sea	260	9458	6772551	6773071	521	6772688	6772831	144	5.89E-15	0.84204793	0	0
11	62607827	WDR74	TSS200	shore	18	6288	62607560	62611744	4185	62607811	62610003	2193	1.00E-10	0.842174232	0	0
19	14785593	EMR3	5'UTR	open sea	260	9524	14785333	14785864	532	14785593	14785849	257	1.15E-12	0.842291176	0	0
11	68227812	SAPS3	TSS1500	shore	64	6384	68227740	68227876	137	68227804	68227861	58	7.86E-17	0.842735887	0	0
1	162467208	UHMK1	TSS1500	shore	64	714	162467116	162467272	157	162467180	162467208	29	1.22E-13	0.842947304	0	0
15	65478018	CLPX	TSS1500	island	28	7977	65477990	65478046	57	65477998	65478037	40	8.38E-13	0.843097985	0	0
2	159825143	TANC1	TSS200	island	9	1375	159825137	159825223	87	159825138	159825180	43	7.86E-10	0.843120456	0	0
17	38474425	RARA	5'UTR	island	50	8924	38474328	38474428	101	38474349	38474425	77	1.60E-10	0.843348801	0	0
14	90798170	C14orf102	5'UTR	island	50	7690	90797946	90798245	300	90798063	90798225	163	5.24E-11	0.843373239	0	0
8	124286482	ZHX1	5'UTR	island	50	5148	124286463	124286563	101	124286482	124286560	79	2.18E-10	0.84348762	0	0
11	747294	TALDO1	TSS200	island	9	5994	747285	747310	26	747294	747301	8	6.75E-22	0.843648553	0	0
1	150552348	MCL1	TSS1500	island	28	617	150552318	150552446	129	150552348	150552382	35	2.09E-07	0.843686938	0	0
11	67797913	NDUFS8	TSS200	island	9	6373	67797904	67797940	37	67797908	67797936	29	3.68E-19	0.843874454	0	0
4	106629741	INTS12	5'UTR	island	50	2427	106629700	106629800	101	106629741	106629795	55	1.00E-10	0.844101071	0	0
12	14996143	ART4	5'UTR	open sea	260	6736	14996012	14996551	540	14996143	14996527	385	5.45E-27	0.844308972	0	0
6	30294854	TRIM39	5'UTR	island	50	3403	30293887	30294981	1095	30293951	30294980	1030	1.15E-27	0.844522893	0	0
4	166248074	SC4MOL	TSS1500	shore	64	2511	166248010	166248138	129	166248057	166248124	68	1.11E-22	0.84469527	0	0
18	51884989	C18orf54	TSS200	island	9	9370	51884973	51884991	19	51884975	51884989	15	1.29E-09	0.84480381	0	0
7	102036881	PRKRIP1	1stExon	island	43	4563	102036781	102036881	101	102036828	102036881	54	3.93E-26	0.84528029	0	0
22	39715674	SNORD43	TSS1500	island	28	10060	39711747	39715823	4077	39712633	39715822	3190	2.40E-21	0.845469236	0	0
8	38088883	DDHD2	TSS200	island	9	4987	38088865	38088883	19	38088865	38088883	19	2.10E-13	0.845636964	0	0
2	113931518	PSD4	TSS200	open sea	26	1294	113931483	113931647	165	113931518	113931565	48	7.30E-18	0.846642077	0	0
2	70120936	SNRNP27	TSS200	open sea	26	1188	70120795	70121885	1091	70120936	70121688	753	1.52E-25	0.846813738	0	0
19	52643354	ZNF616	TSS200	shore	18	9710	52643337	52643471	135	52643354	52643407	54	1.46E-17	0.846921802	0	0
2	86095308	ST3GAL5	TSS1500	open sea	113	1233	86094415	86095357	943	86094755	86095320	566	3.38E-13	0.847107351	0	0
18	39535226	PIK3C3	1stExon	open sea	82	9355	39535144	39535308	165	39535162	39535255	94	1.12E-14	0.847354829	0	0
1	24745395	NIPAL3	5'UTR	shelf	1625	288	24743770	24747020	3251	24744118	24746734	2617	3.03E-12	0.847594678	0	0
2	172967612	DLX2	TSS200	island	9	1399	172967603	172967621	19	172967608	172967620	13	1.22E-10	0.84827888	0	0
14	88459528	GALC	1stExon	island	43	7681	88459445	88459531	87	88459471	88459528	58	2.82E-14	0.848768115	0	0
1	145549283	ANKRD35	1stExon	open sea	82	590	145548970	145549912	943	145549064	145549441	378	8.53E-06	0.848882914	0	0
16	88772647	RNF166	1stExon	island	43	8584	88772604	88772707	104	88772647	88772664	18	1.98E-18	0.849187434	0	0
14	76127849	TTLL5	5'UTR	island	50	7664	76127793	76127893	101	76127793	76127849	57	5.95E-11	0.849362314	0	0
12	58176348	TSFM	TSS200	open sea	26	6892	58174229	58178231	4003	58175385	58176694	1310	1.30E-09	0.849671662	0	0
12	133613861	ZNF84	TSS200	island	9	7206	133613861	133613947	87	133613861	133613924	64	2.50E-15	0.849772274	0	0
14	58894377	KIAA0586	TSS1500	shore	64	7606	58894331	58894522	192	58894377	58894515	139	7.75E-16	0.849894047	0	0
16	67753445	GFOD2	TSS200	island	9	8419	67753444	67753618	175	67753445	67753554	110	2.39E-13	0.849980712	0	0
5	68665562	RAD17	TSS200	island	9	2785	68665390	68666036	647	68665393	68665965	573	1.64E-17	0.850243568	0	0
1	180992114	STX6	TSS200	island	9	760	180992101	180992126	26	180992110	180992117	8	2.76E-12	0.850357652	0	0
22	42228998	SREBF2	TSS200	island	9	10069	42228980	42229007	28	42228989	42228998	10	3.73E-08	0.851037383	0	0
8	67341355	RRS1	5'UTR	island	50	5042	67341256	67341405	150	67341294	67341360	67	2.51E-09	0.8516891	0	0
10	103543178	NPM3	TSS200	island	9	5723	103543169	103543187	19	103543172	103543183	12	7.43E-12	0.852130294	0	0
2	114514590	SLC35F5	TSS200	island	9	1296	114514587	114514643	57	114514590	114514620	31	4.48E-10	0.85228771	0	0
5	133702588	CDKL3	5'UTR	shore	117	2891	133702457	133702705	249	133702574	133702676	103	6.24E-16	0.853050888	0	0
18	51795809	POLI	TSS200	island	9	9369	51795806	51795824	19	51795809	51795821	13	7.13E-08	0.853486121	0	0
3	195808919	TFRC	1stExon	island	43	2113	195808829	195808964	136	195808879	195808921	43	6.68E-12	0.853700817	0	0
19	21541537	ZNF738	TSS200	open sea	26	9564	21540833	21542243	1411	21540946	21541917	972	1.57E-15	0.853732884	0	0
16	66638407	CMTM3	5'UTR	island	50	8405	66638357	66638483	127	66638396	66638438	43	3.45E-06	0.853979647	0	0
18	8717113	KIAA0802	TSS1500	open sea	113	9321	8716898	8717226	329	8717011	8717113	103	6.70E-11	0.854512632	0	0
6	30585533	MRPS18B	5'UTR	island	50	3422	30585463	30586020	558	30585473	30585873	401	3.16E-16	0.854590178	0	0
4	109541802	LOC285456	TSS200	open sea	26	2430	109540922	109542404	1483	109541393	109542144	752	9.55E-25	0.85489732	0	0
1	113498742	SLC16A1	1stExon	island	43	559	113498718	113498804	87	113498742	113498799	58	2.57E-07	0.855404913	0	0
11	47291493	MADD	TSS200	island	9	6233	47291476	47291502	27	47291485	47291501	17	1.25E-08	0.85559237	0	0
13	26828759	CDK8	5'UTR	island	50	7239	26828709	26828809	101	26828738	26828759	22	1.82E-10	0.8571769	0	0
15	52472330	GNB5	TSS200	shore	18	7950	52472319	52472453	135	52472330	52472389	60	2.19E-11	0.857201993	0	0
3	197476486	FYTTD1	1stExon	island	43	2124	197476443	197476604	162	197476477	197476591	115	8.76E-16	0.85741961	0	0
20	5591870	RP5-1022P6.2	TSS200	island	9	9783	5591846	5591989	144	5591866	5591950	85	1.41E-11	0.857513845	0	0
12	118573745	PEBP1	TSS200	island	9	7037	118573727	118573745	19	118573731	118573745	15	3.80E-06	0.857724011	0	0
1	93811585	DR1	5'UTR	island	50	516	93811514	93811635	122	93811564	93811631	68	2.04E-11	0.857959628	0	0
18	48556578	SMAD4	TSS200	island	9	9366	48556567	48556589	23	48556576	48556580	5	3.02E-11	0.858548522	0	0
11	134094371	NCAPD3	1stExon	island	43	6649	134094319	134094414	96	134094362	134094371	10	3.49E-17	0.858857512	0	0
5	7869257	MTRR	1stExon	island	43	2691	7869214	7869336	123	7869257	7869293	37	1.25E-07	0.858944893	0	0
22	24823554	ADORA2A	1stExon	shelf	83	9996	24822858	24826108	3251	24823050	24824483	1434	1.87E-11	0.858947814	0	0
2	242127948	ANO7	5'UTR	open sea	260	1657	242127688	242128208	521	242127690	242127948	259	1.81E-10	0.858981609	0	0
12	28123054	PTHLH	TSS200	island	9	6757	28123054	28123072	19	28123054	28123068	15	2.11E-08	0.85972625	0	0
13	31736119	HSPH1	TSS200	island	9	7259	31736055	31736155	101	31736105	31736122	18	2.36E-19	0.859811008	0	0
6	35436198	RPL10A	1stExon	island	43	3631	35436146	35436232	87	35436159	35436198	40	2.45E-09	0.860062599	0	0
4	109571414	OSTC	TSS1500	shore	64	2431	109571389	109571517	129	109571402	109571502	101	9.62E-08	0.860137045	0	0
12	2921766	ITFG2	TSS200	shore	18	6673	2921739	2921775	37	2921745	2921766	22	6.05E-06	0.86024332	0	0
14	62228983	SNAPC1	TSS200	island	9	7620	62228974	62228992	19	62228975	62228987	13	1.08E-11	0.860576391	0	0
2	190305608	WDR75	TSS1500	shore	64	1451	190305460	190306434	975	190305524	190306432	909	8.15E-23	0.860627711	0	0
15	90118805	C15orf42	TSS200	shore	18	8079	90118790	90118922	133	90118805	90118856	52	2.47E-22	0.860894144	0	0
10	99161148	RRP12	TSS200	shore	18	5685	99161059	99161159	101	99161062	99161148	87	9.86E-16	0.860946417	0	0
10	102027486	CWF19L1	TSS200	island	9	5699	102027477	102027495	19	102027479	102027489	11	5.63E-16	0.861065269	0	0
14	20881581	TEP1	TSS200	island	9	7533	20881520	20881624	105	20881570	20881602	33	3.38E-09	0.861629426	0	0
12	62997433	C12orf61	TSS1500	island	28	6895	62997405	62997471	67	62997409	62997443	35	2.62E-16	0.861724496	0	0
3	98241922	CLDND1	TSS200	shore	18	1895	98241904	98241945	42	98241922	98241927	6	1.48E-15	0.861747563	0	0
11	28129967	METT5D1	5'UTR	shore	117	6171	28127497	28131477	3981	28129122	28130018	897	3.06E-23	0.86187917	0	0
10	112257617	DUSP5	TSS200	island	9	5745	112257603	112257630	28	112257612	112257621	10	3.40E-11	0.862177491	0	0
14	61201413	MNAT1	TSS200	open sea	26	7617	61201209	61202448	1240	61201413	61201977	565	1.04E-28	0.86236304	0	0
8	42356731	SLC20A2	5'UTR	open sea	260	4998	42356377	42357131	755	42356637	42356871	235	1.07E-12	0.862532854	0	0
18	3262499	MYL12B	5'UTR	island	50	9313	3262480	3262599	120	3262499	3262549	51	9.34E-06	0.862718046	0	0
12	54582532	SMUG1	5'UTR	open sea	260	6851	54582272	54582933	662	54582532	54582884	353	2.19E-28	0.863092542	0	0
13	50070482	PHF11	TSS200	island	9	7303	50070471	50070629	159	50070482	50070550	69	2.44E-20	0.863319516	0	0
17	12569117	MYOCD	TSS200	island	9	8785	12569101	12569126	26	12569110	12569117	8	2.04E-11	0.864732444	0	0
1	78445165	FUBP1	TSS1500	island	28	488	78445134	78445197	64	78445162	78445169	8	3.18E-16	0.864816844	0	0
13	25497356	CENPJ	TSS1500	shore	64	7232	25497259	25497420	162	25497298	25497356	59	9.45E-06	0.864881635	0	0
11	22647642	FANCF	TSS1500	shore	64	6161	22647545	22647714	170	22647609	22647650	42	5.82E-14	0.865104556	0	0
1	150294056	PRPF3	5'UTR	island	50	614	150294006	150294106	101	150294006	150294084	79	3.58E-09	0.865519822	0	0
9	95055737	IARS	5'UTR	shore	117	5301	95055620	95055854	235	95055737	95055839	103	4.91E-06	0.866015136	0	0
6	33386042	CUTA	1stExon	island	43	3614	33380794	33386100	5307	33381680	33386073	4394	3.79E-16	0.866048872	0	0
11	67210812	CORO1B	5'UTR	open sea	260	6361	67210552	67211358	807	67210812	67211318	507	9.85E-21	0.866075039	0	0
14	82000246	SEL1L	TSS200	island	9	7677	82000241	82000259	19	82000246	82000258	13	3.90E-06	0.86623168	0	0
4	2936732	C4orf10	TSS1500	island	28	2192	2936696	2937223	528	2936706	2937159	454	1.81E-19	0.866559744	0	0
8	23144983	R3HCC1	TSS1500	shore	64	4935	23141689	23145171	3483	23143430	23145039	1610	1.03E-10	0.866574764	0	0
19	44100691	ZNF576	1stExon	island	43	9638	44100522	44100762	241	44100565	44100719	155	4.76E-20	0.866589606	0	0
2	201171255	SPATS2L	5'UTR	island	50	1469	201171205	201171386	182	201171255	201171347	93	1.56E-14	0.866741598	0	0
7	100860777	ZNHIT1	TSS1500	island	28	4547	100860776	100860862	87	100860777	100860849	73	1.80E-11	0.866925478	0	0
10	91461351	KIF20B	TSS200	island	9	5660	91461342	91461428	87	91461351	91461385	35	2.43E-15	0.867012203	0	0
6	31621210	BAT3	TSS1500	shore	64	3492	31619645	31621243	1599	31619762	31621210	1449	1.47E-25	0.867086649	0	0
1	38455939	SF3A3	TSS200	shore	18	355	38455897	38456051	155	38455939	38455987	49	3.43E-08	0.86757338	0	0
14	101359813	MEG8	TSS1500	open sea	113	7755	101359790	101360155	366	101359793	101360103	311	1.01E-09	0.867660761	0	0
12	49525491	TUBA1B	TSS200	island	9	6797	49525470	49525606	137	49525474	49525542	69	2.45E-13	0.868430793	0	0
7	32530131	LSM5	TSS200	island	9	4329	32529938	32530429	492	32529948	32530336	389	3.19E-16	0.868473053	0	0
12	4648009	RAD51AP1	1stExon	island	43	6689	4647966	4648095	130	4648009	4648052	44	1.54E-11	0.868503094	0	0
1	44399869	ARTN	5'UTR	shore	117	388	44399752	44399986	235	44399776	44399894	119	1.68E-07	0.868555963	0	0
11	121163095	SC5DL	TSS1500	shore	64	6571	121163031	121163205	175	121163095	121163141	47	5.45E-10	0.869097531	0	0
17	41363741	TMEM106A	TSS200	island	9	8962	41363322	41363808	487	41363502	41363789	288	2.31E-07	0.869136333	0	0
10	103113705	BTRC	TSS200	island	9	5720	103113693	103113711	19	103113695	103113705	11	5.76E-19	0.86917603	0	0
8	110551808	EBAG9	TSS1500	island	28	5131	110551768	110551836	69	110551796	110551808	13	8.72E-10	0.869303286	0	0
3	53290205	TKT	TSS200	island	9	1842	53290191	53290209	19	53290192	53290205	14	1.36E-09	0.869636476	0	0
10	114709917	TCF7L2	TSS200	shelf	26	5751	114709900	114709972	73	114709917	114709957	41	1.84E-23	0.869828701	0	0
15	42787814	SNAP23	TSS200	open sea	26	7926	42787686	42788206	521	42787717	42788175	459	2.62E-16	0.869894743	0	0
17	4634690	MED11	TSS200	island	9	8717	4634678	4634790	113	4634690	4634740	51	1.56E-07	0.870189905	0	0
11	62559545	TMEM223	TSS200	island	9	6286	62559458	62559818	361	62559514	62559713	200	8.47E-06	0.870466709	0	0
3	129118667	RPL32P3	TSS1500	open sea	113	1965	129118416	129122418	4003	129118538	129121021	2484	6.78E-12	0.87049526	0	0
17	6555120	C17orf100	5'UTR	island	50	8730	6555043	6555180	138	6555093	6555130	38	1.02E-16	0.870710492	0	0
14	24658099	IPO4	1stExon	island	43	7563	24658056	24658144	89	24658099	24658143	45	2.66E-17	0.871183932	0	0
17	72869117	FDXR	1stExon	island	43	9103	72869097	72869183	87	72869117	72869164	48	6.66E-13	0.871341228	0	0
3	37035355	MLH1	1stExon	island	43	1767	37035282	37035516	235	37035282	37035399	118	2.18E-10	0.871608853	0	0
8	33370659	C8orf41	1stExon	shore	66	4973	33370571	33370759	189	33370637	33370759	123	5.32E-15	0.871837556	0	0
13	21635735	LATS2	TSS200	island	9	7216	21635718	21635736	19	21635722	21635735	14	7.33E-09	0.872521818	0	0
1	153581750	S100A16	5'UTR	open sea	260	643	153577798	153582053	4256	153579799	153581793	1995	2.80E-14	0.872536421	0	0
19	13617518	CACNA1A	TSS1500	shore	64	9517	13617485	13617613	129	13617518	13617584	67	1.79E-11	0.872647107	0	0
5	170846513	FGF18	TSS200	island	9	3037	170846504	170846522	19	170846504	170846517	14	1.90E-15	0.872799993	0	0
6	71012806	COL9A1	TSS200	open sea	26	3715	71011920	71012862	943	71012391	71012852	462	3.23E-13	0.87344718	0	0
17	18218556	TOP3A	TSS1500	island	28	8810	18218528	18218600	73	18218556	18218585	30	3.71E-09	0.875008881	0	0
2	47142885	MCFD2	5'UTR	island	50	1139	47142817	47143156	340	47142867	47143135	269	9.42E-17	0.875377178	0	0
11	65769523	EIF1AD	1stExon	island	43	6338	65769468	65769566	99	65769511	65769523	13	3.89E-09	0.87557143	0	0
16	27215225	JMJD5	5'UTR	island	50	8306	27215196	27215331	136	27215225	27215306	82	1.02E-09	0.875617385	0	0
3	136581031	NCK1	TSS200	island	9	1979	136581022	136581044	23	136581031	136581035	5	2.02E-08	0.876158595	0	0
10	98273903	TLL2	TSS1500	island	28	5680	98273875	98273952	78	98273903	98273924	22	1.01E-11	0.876679838	0	0
6	13615538	NOL7	TSS200	island	9	3211	13615520	13615620	101	13615533	13615583	51	9.94E-09	0.877044022	0	0
13	41593582	ELF1	TSS200	open sea	26	7279	41593125	41593676	552	41593385	41593582	198	7.75E-19	0.877123117	0	0
4	113558556	LARP7	5'UTR	island	50	2444	113558459	113558637	179	113558509	113558587	79	2.07E-11	0.878239274	0	0
6	69344416	BAI3	TSS1500	shore	64	3711	69344342	69344487	146	69344406	69344423	18	1.39E-07	0.878381371	0	0
17	57233042	PRR11	TSS200	shore	18	9057	57233040	57233181	142	57233042	57233134	93	1.67E-14	0.878647268	0	0
10	70748274	KIAA1279	TSS1500	shore	64	5590	70748149	70748338	190	70748213	70748332	120	2.39E-17	0.878855646	0	0
4	17578663	LAP3	TSS1500	island	28	2305	17578635	17578719	85	17578663	17578691	29	1.01E-08	0.878989935	0	0
16	3285496	ZNF200	TSS200	island	9	8225	3285480	3285510	31	3285489	3285501	13	7.55E-09	0.879011631	0	0
20	31407537	MAPRE1	TSS200	island	9	9819	31407528	31407546	19	31407532	31407542	11	3.18E-17	0.879586041	0	0
14	24615913	RNF31	TSS1500	shore	64	7560	24615860	24615988	129	24615913	24615978	66	3.08E-15	0.879997194	0	0
6	30034558	PPP1R11	TSS1500	open sea	113	3383	30034292	30037379	3088	30034398	30037202	2805	1.10E-22	0.88008666	0	0
16	71323317	FTSJD1	5'UTR	island	50	8443	71323267	71323430	164	71323317	71323418	102	1.41E-17	0.881990612	0	0
17	80408909	C17orf62	TSS1500	shore	64	9284	80408845	80408992	148	80408864	80408928	65	2.37E-19	0.882090628	0	0
12	6772270	ING4	1stExon	island	43	6706	6772039	6772333	295	6772186	6772317	132	4.13E-12	0.882353485	0	0
3	51976003	PARP3	TSS1500	island	28	1829	51975940	51976031	92	51975968	51976003	36	7.51E-15	0.882434011	0	0
14	102829267	CINP	TSS200	island	9	7779	102829258	102829276	19	102829258	102829271	14	8.79E-12	0.882443607	0	0
15	40886176	CASC5	TSS1500	shore	64	7914	40886124	40886252	129	40886176	40886247	72	1.93E-15	0.882472456	0	0
6	91297046	MAP3K7	TSS1500	island	28	3766	91297012	91297074	63	91297040	91297046	7	2.99E-10	0.882546961	0	0
6	32935843	BRD2	TSS1500	shore	64	3576	32935725	32936107	383	32935738	32936102	365	3.34E-17	0.882625759	0	0
1	100503820	HIAT1	1stExon	island	43	529	100503807	100503965	159	100503813	100503886	74	4.89E-17	0.883001208	0	0
8	21999381	REEP4	1stExon	island	43	4924	21999338	21999459	122	21999381	21999416	36	8.37E-07	0.883162498	0	0
19	44488170	ZNF155	TSS200	open sea	26	9643	44488008	44488240	233	44488121	44488181	61	1.11E-13	0.883228898	0	0
10	15210836	NMT2	TSS200	shore	18	5476	15210800	15210854	55	15210818	15210836	19	3.03E-13	0.883433044	0	0
10	17270094	VIM	TSS200	shore	18	5481	17270069	17270112	44	17270087	17270094	8	1.29E-15	0.883813679	0	0
15	66161574	RAB11A	TSS1500	island	28	7981	66161565	66161621	57	66161574	66161608	35	1.35E-12	0.884382725	0	0
18	48724274	MEX3C	TSS1500	island	28	9367	48724239	48724304	66	48724267	48724276	10	4.99E-16	0.884906948	0	0
11	61129344	CYBASC3	1stExon	island	43	6274	61129288	61130250	963	61129331	61130246	916	2.95E-24	0.886388183	0	0
12	49297824	CCDC65	TSS200	open sea	26	6792	49297819	49297983	165	49297822	49297974	153	1.38E-14	0.88642472	0	0
6	31670974	BAT5	1stExon	island	43	3501	31670319	31671407	1089	31670396	31671391	996	1.62E-11	0.886505246	0	0
20	48732667	UBE2V1	TSS200	shelf	26	9877	48729802	48734116	4315	48729847	48732979	3133	1.24E-11	0.887147605	0	0
6	30312959	RPP21	1stExon	island	43	3407	30312848	30317209	4362	30312855	30315468	2614	8.41E-23	0.887855947	0	0
20	54987270	CASS4	TSS200	open sea	26	9887	54987070	54987590	521	54987076	54987330	255	3.82E-24	0.888219595	0	0
19	45873861	ERCC2	TSS200	island	9	9651	45873776	45873876	101	45873808	45873861	54	1.07E-08	0.888321459	0	0
19	47290674	SLC1A5	1stExon	island	43	9667	47290631	47290717	87	47290659	47290716	58	6.98E-07	0.889034212	0	0
2	179184864	OSBPL6	TSS200	open sea	26	1432	179184828	179184892	65	179184854	179184866	13	2.05E-16	0.890242577	0	0
14	65289994	SPTB	TSS200	open sea	26	7631	65289980	65290240	261	65289994	65290127	134	2.83E-11	0.890449047	0	0
17	36908971	PSMB3	TSS200	island	9	8891	36908955	36909055	101	36908971	36909051	81	1.87E-11	0.890638173	0	0
1	224517832	NVL	1stExon	island	43	855	224517787	224517878	92	224517830	224517835	6	2.26E-12	0.890873075	0	0
19	52511513	ZNF615	TSS200	island	9	9707	52511493	52511519	27	52511502	52511513	12	8.28E-10	0.891203642	0	0
14	64108576	WDR89	1stExon	island	43	7623	64108518	64108619	102	64108561	64108592	32	9.03E-15	0.891231418	0	0
13	48611439	NUDT15	TSS1500	shore	64	7296	48611399	48611527	129	48611439	48611517	79	1.49E-12	0.891454577	0	0
1	212781781	ATF3	TSS1500	island	28	824	212781739	212781809	71	212781767	212781781	15	6.99E-16	0.892444968	0	0
11	93517137	MED17	TSS1500	shore	64	6489	93517058	93517463	406	93517122	93517413	292	8.51E-28	0.892451286	0	0
2	27593292	EIF2B4	5'UTR	island	50	1103	27592681	27593344	664	27592828	27593343	516	3.08E-16	0.892675996	0	0
11	104839343	CASP4	TSS200	open sea	26	6504	104838603	104839545	943	104839074	104839349	276	1.84E-23	0.892790675	0	0
7	95064464	PON2	TSS200	shore	18	4492	95064446	95064492	47	95064464	95064474	11	8.07E-16	0.892806888	0	0
12	109915371	KCTD10	TSS1500	island	28	6984	109915339	109915412	74	109915367	109915400	34	4.29E-11	0.893771946	0	0
5	19988800	CDH18	TSS1500	open sea	113	2711	19988479	19988819	341	19988592	19988800	209	4.24E-11	0.893920898	0	0
6	20534748	CDKAL1	1stExon	open sea	82	3232	20534613	20534830	218	20534632	20534796	165	1.24E-26	0.894022107	0	0
2	68290165	C1D	TSS200	open sea	26	1179	68289712	68290232	521	68289972	68290174	203	2.66E-07	0.894109011	0	0
12	110841545	ANAPC7	TSS200	island	9	6995	110841473	110842031	559	110841516	110842031	516	3.38E-08	0.894173205	0	0
18	12702791	PSMG2	TSS1500	island	28	9329	12702763	12702847	85	12702765	12702832	68	5.81E-13	0.894509554	0	0
10	21807252	C10orf140	5'UTR	shore	117	5490	21807049	21807369	321	21807166	21807252	87	3.13E-13	0.894654393	0	0
5	138630396	MATR3	5'UTR	shore	117	2913	138630279	138630619	341	138630302	138630502	201	6.45E-17	0.895660043	0	0
11	58345695	ZFP91	TSS1500	island	28	6256	58345659	58345745	87	58345687	58345717	31	1.67E-15	0.896386027	0	0
1	160068676	IGSF8	TSS1500	shore	64	695	160068501	160068745	245	160068504	160068681	178	4.41E-16	0.896451235	0	0
3	128840686	RAB43	TSS200	shore	18	1962	128840658	128840900	243	128840660	128840836	177	7.73E-17	0.896757424	0	0
11	31530943	IMMP1L	5'UTR	shore	117	6175	31530929	31531163	235	31530943	31531135	193	1.19E-11	0.896841526	0	0
22	22337153	TOP3B	TSS200	island	9	9994	22337091	22337438	348	22337141	22337374	234	1.14E-26	0.897955596	0	0
5	52856570	NDUFS4	1stExon	shore	66	2756	52856410	52856596	187	52856452	52856570	119	1.54E-16	0.898133159	0	0
8	63161616	NKAIN3	1stExon	island	43	5034	63161536	63161659	124	63161579	63161616	38	6.70E-15	0.89847362	0	0
11	27528506	LIN7C	TSS200	island	9	6167	27528489	27528507	19	27528489	27528506	18	4.61E-19	0.898824215	0	0
3	179370471	USP13	TSS1500	island	28	2054	179370356	179370484	129	179370420	179370471	52	2.74E-17	0.89887923	0	0
17	79849444	ANAPC11	TSS200	island	9	9260	79849429	79849447	19	79849429	79849444	16	3.68E-09	0.899509132	0	0
7	65671987	TPST1	5'UTR	shore	117	4422	65671431	65674681	3251	65671551	65673056	1506	3.75E-28	0.899781644	0	0
15	29562223	NDNL2	TSS1500	shore	64	7881	29562159	29562287	129	29562194	29562285	92	1.85E-07	0.899846733	0	0
7	106504722	PIK3CG	TSS1500	shelf	97	4573	106504336	106507586	3251	106504722	106507474	2753	4.76E-16	0.899880111	0	0
19	40562337	ZNF780B	TSS1500	shore	64	9621	40562273	40562418	146	40562314	40562354	41	4.10E-14	0.900754988	0	0
17	71088851	SLC39A11	1stExon	open sea	82	9090	71088447	71088967	521	71088707	71088962	256	4.01E-13	0.900762975	0	0
5	176836695	F12	TSS200	open sea	26	3082	176836275	176836795	521	176836472	176836695	224	1.51E-13	0.901089132	0	0
1	115259668	NRAS	TSS200	open sea	26	570	115257969	115262561	4593	115258650	115260560	1911	1.71E-21	0.9014166	0	0
19	36139020	COX6B1	TSS200	shelf	26	9588	36137969	36141219	3251	36138344	36139594	1251	1.64E-16	0.90147537	0	0
15	72978746	HIGD2B	TSS1500	island	28	8007	72978718	72978774	57	72978726	72978757	32	3.07E-11	0.902388215	0	0
14	36295651	BRMS1L	5'UTR	island	50	7580	36295620	36295720	101	36295651	36295713	63	3.34E-17	0.903029561	0	0
5	131826479	IRF1	TSS200	island	9	2888	131826415	131826501	87	131826458	131826485	28	2.53E-15	0.904537499	0	0
19	36606541	POLR2I	TSS1500	island	28	9593	36606520	36606691	172	36606541	36606612	72	2.11E-08	0.904821157	0	0
1	8878225	RERE	TSS1500	shore	64	179	8878109	8878291	183	8878173	8878227	55	2.80E-12	0.905940533	0	0
13	37573396	ALG5	1stExon	island	43	7274	37572722	37573720	999	37572869	37573656	788	1.05E-18	0.906102955	0	0
1	27021107	ARID1A	TSS1500	shore	64	298	27017156	27021384	4229	27018897	27021107	2211	1.29E-09	0.906587958	0	0
1	150039108	VPS45	TSS1500	shore	64	610	150039017	150039414	398	150039081	150039387	307	1.61E-12	0.907075465	0	0
2	112812751	TMEM87B	TSS200	shore	18	1291	112812738	112812790	53	112812751	112812775	25	1.60E-15	0.907236814	0	0
2	24270412	C2orf44	TSS200	shelf	26	1085	24268241	24271491	3251	24269866	24270586	721	1.10E-13	0.909154832	0	0
2	178129899	NFE2L2	TSS1500	shore	64	1429	178129835	178129976	142	178129899	178129912	14	1.42E-13	0.909183741	0	0
10	105727545	SLK	1stExon	shore	66	5736	105727537	105727831	295	105727545	105727772	228	4.61E-09	0.90966469	0	0
2	99797711	MITD1	TSS1500	shore	64	1265	99797647	99797828	182	99797711	99797764	54	7.37E-10	0.910967588	0	0
11	64703415	GPHA2	TSS200	open sea	26	6316	64699909	64703911	4003	64701910	64703818	1909	8.22E-15	0.911271155	0	0
2	85581917	ELMOD3	1stExon	island	43	1229	85581597	85582116	520	85581647	85582064	418	8.94E-19	0.911312699	0	0
10	96305691	HELLS	1stExon	island	43	5673	96305555	96306428	874	96305598	96306281	684	6.72E-17	0.911399782	0	0
10	70883301	VPS26A	TSS1500	shore	64	5592	70883237	70883365	129	70883261	70883337	77	4.81E-11	0.911780715	0	0
4	71767868	MOBKL1A	TSS200	island	9	2377	71767833	71767889	57	71767861	71767871	11	9.90E-16	0.911920309	0	0
1	145438331	TXNIP	TSS200	open sea	26	588	145438018	145439752	1735	145438031	145439281	1251	1.74E-15	0.91199702	0	0
11	118436713	C11orf60	5'UTR	open sea	260	6552	118436263	118437038	776	118436523	118436991	469	1.24E-15	0.912553787	0	0
17	7476105	EIF4A1	1stExon	island	43	8750	7476097	7476183	87	7476105	7476167	63	8.14E-15	0.913733423	0	0
6	43027269	KLC4	TSS1500	island	28	3667	43027238	43027331	94	43027266	43027303	38	1.06E-17	0.913787723	0	0
1	114447605	AP4B1	5'UTR	island	50	562	114447521	114447655	135	114447571	114447605	35	4.74E-12	0.91409415	0	0
8	101162809	POLR2K	TSS200	open sea	26	5108	101162666	101163186	521	101162726	101162926	201	1.84E-09	0.91426605	0	0
17	26926076	SPAG5	TSS200	island	9	8841	26926000	26926100	101	26926011	26926076	66	5.45E-15	0.915231705	0	0
7	77427873	PHTF2	TSS1500	island	28	4460	77427823	77427901	79	77427851	77427873	23	1.22E-30	0.915484309	0	0
1	109633214	TMEM167B	TSS200	island	9	539	109633161	109633217	57	109633189	109633214	26	2.97E-17	0.916661203	0	0
11	74660152	XRRA1	1stExon	island	43	6452	74660109	74660233	125	74660152	74660190	39	2.11E-08	0.917082012	0	0
11	57425128	CLP1	TSS200	island	9	6253	57425119	57425137	19	57425124	57425136	13	1.61E-12	0.917872369	0	0
19	984170	WDR18	TSS200	island	9	9408	984157	984179	23	984166	984170	5	1.76E-10	0.918027639	0	0
10	3215076	PITRM1	TSS200	island	9	5403	3215055	3215082	28	3215064	3215076	13	1.95E-19	0.918234885	0	0
20	33735167	EDEM2	TSS200	island	9	9827	33735108	33735194	87	33735143	33735169	27	3.18E-10	0.920325398	0	0
15	74833314	ARID3B	TSS1500	island	28	8018	74833269	74833342	74	74833297	74833314	18	6.26E-16	0.922078252	0	0
19	11485375	C19orf39	TSS200	island	9	9490	11485364	11485479	116	11485375	11485452	78	2.56E-21	0.922212303	0	0
20	61427688	C20orf20	TSS200	island	9	9909	61427675	61427702	28	61427684	61427693	10	3.61E-13	0.922801554	0	0
17	6915594	RNASEK	TSS1500	shore	64	8734	6915530	6915658	129	6915577	6915644	68	3.61E-12	0.924712479	0	0
14	20923800	OSGEP	TSS1500	island	28	7534	20922885	20923893	1009	20922913	20923814	902	8.76E-28	0.925541461	0	0
16	67850677	TSNAXIP1	5'UTR	open sea	260	8420	67850356	67850965	610	67850616	67850705	90	4.21E-15	0.926999092	0	0
19	10828950	DNM2	1stExon	island	43	9484	10828885	10829015	131	10828928	10828972	45	2.86E-24	0.927056313	0	0
19	55851260	SUV420H2	1stExon	island	43	9732	55851194	55851303	110	55851237	55851260	24	1.15E-17	0.928913295	0	0
19	6737662	GPR108	TSS1500	island	28	9457	6737641	6737941	301	6737662	6737889	228	9.45E-23	0.930540562	0	0
9	36258114	GNE	5'UTR	shore	117	5294	36257997	36258231	235	36258114	36258196	83	1.39E-14	0.93258214	0	0
11	66139712	SLC29A2	TSS1500	island	28	6346	66139684	66139745	62	66139712	66139717	6	3.11E-21	0.936242759	0	0
1	27320252	TRNP1	5'UTR	island	50	302	27320164	27320264	101	27320200	27320252	53	3.27E-11	0.93640244	0	0
